# Supplementary material
Source: PubMed Central journal article supplement (PMC9870934)
Supplement: NIHMS1854403-supplement-Supplemental_Publication_Material.pdf [file NIHMS1854403-supplement-Supplemental_Publication_Material.pdf]

**Supplemental Figure 1.** Proportion of successful 30-day transition of stroke care measures by discharge disposition

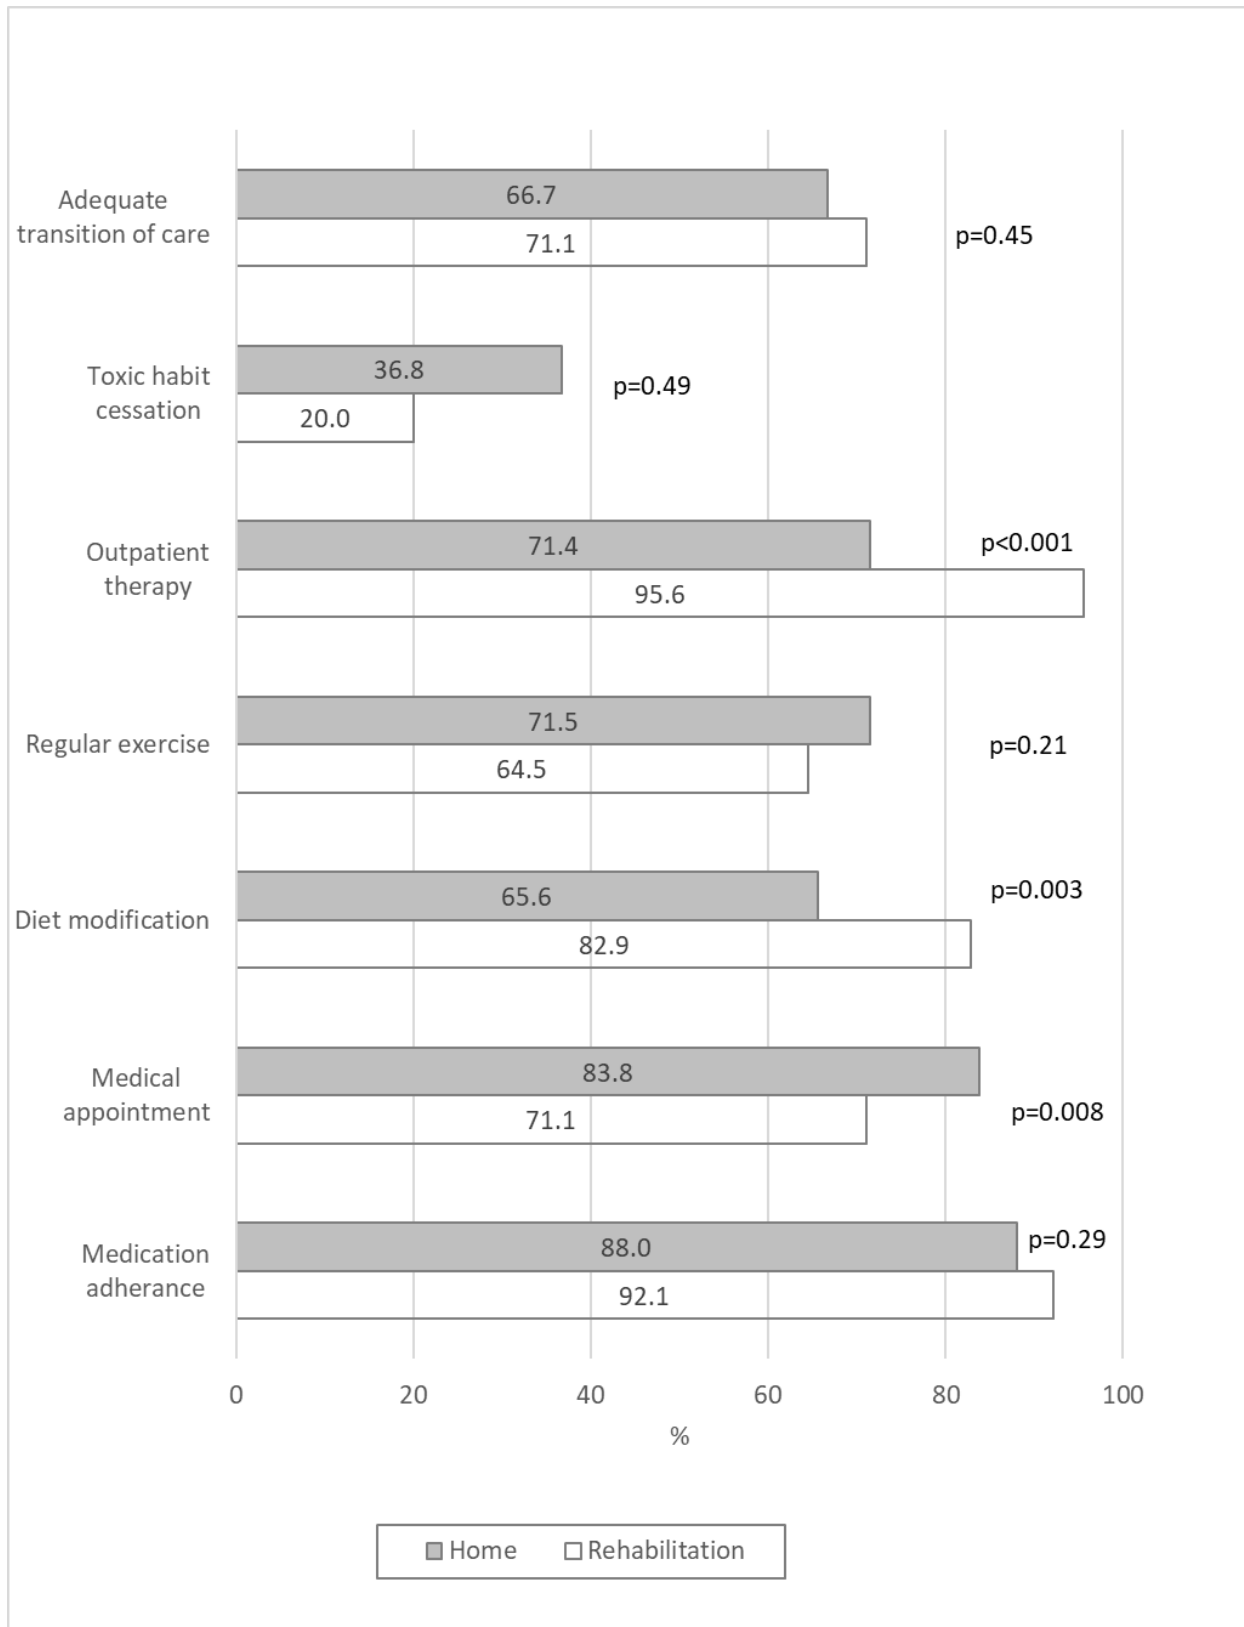

| <b>Supplemental Table 1.</b> MaRISS participating hospitals, site principal investigator and principal coordinator. |                                       |                                    |
|---------------------------------------------------------------------------------------------------------------------|---------------------------------------|------------------------------------|
| <b>Recruiting site</b>                                                                                              | <b>Site principal investigator(s)</b> | <b>Principal coordinator</b>       |
| Jackson Memorial Hospital                                                                                           | Jose Romano, Erika Marulanda-Londono  | German Orellana, Emily Montgomerie |
| Baptist of South Florida                                                                                            | Felipe De Los Rios La Rosa            | Josette Elysee                     |
| Intercostal-Sarasota Memorial Hospital                                                                              | Mauricio Concha                       | Jeanette Wilson                    |
| Tampa General Hospital/USF                                                                                          | W. Scott Burgin                       | Nicholas (Corbin) Hilker           |
| Southern Baptist (Jacksonville)                                                                                     | Ricardo Hanel                         | Vickie (Susan) Melton              |
| Shands Hospital/UF                                                                                                  | Anna Khanna                           | Franklin Echevarria                |
| Memorial Regional Healthcare System                                                                                 | Brijesh Mehta                         | Doris Alaby                        |
| Sacred Heart                                                                                                        | Terry Neill                           | Diane Tignor                       |
| St. Joseph's BayCare                                                                                                | Sanjiv Sahoo                          | Christine DeArmond                 |
| Morton Plant BayCare                                                                                                | Ajay Arora                            | Jena Botsford                      |

| <b>Supplemental Table 2. Baseline characteristics and 30-day adequate transition of care composite measure</b> |                                                                    |                    |                |
|----------------------------------------------------------------------------------------------------------------|--------------------------------------------------------------------|--------------------|----------------|
| <b>Characteristics</b>                                                                                         | <b>30-day adequate transition of care composite measure (ATOC)</b> |                    |                |
|                                                                                                                | <b>No (n=180)</b>                                                  | <b>Yes (n=370)</b> | <b>p value</b> |
| Age, years, mean (SD)                                                                                          | 64 (13)                                                            | 63(15)             | 0.17           |
| Neighborhood, years, mean (SD)                                                                                 | 14 (15)                                                            | 16 (15)            | 0.11           |
| Female, %                                                                                                      | 44.4                                                               | 43                 | 0.74           |
| Race                                                                                                           |                                                                    |                    |                |
| Non-Hispanic White, %                                                                                          | 49.4                                                               | 47                 | 0.9            |
| Non-Hispanic Black, %                                                                                          | 23.9                                                               | 23.2               |                |
| Hispanic, %                                                                                                    | 23.9                                                               | 26.8               |                |
| Non-Hispanic Other, %                                                                                          | 2.8                                                                | 3                  |                |
| Foreign born%                                                                                                  | 32.2                                                               | 35.9               | 0.39           |
| English, %                                                                                                     | 77.2                                                               | 74.1               | 0.42           |
| Education                                                                                                      |                                                                    |                    |                |
| Less than high school, %                                                                                       | 12.2                                                               | 12.2               | 0.27           |
| Completed high school, %                                                                                       | 37.8                                                               | 31.1               |                |
| Some college or more, %                                                                                        | 50                                                                 | 56.8               |                |
| Health insurance                                                                                               |                                                                    |                    |                |
| Private Insurance, %                                                                                           | 20.6                                                               | 28.1               | 0.17           |
| Medicare, %                                                                                                    | 46.7                                                               | 42.7               |                |
| Medicaid, %                                                                                                    | 7.2                                                                | 4.3                |                |
| Self/None, %                                                                                                   | 25.6                                                               | 24.9               |                |
| Employment                                                                                                     |                                                                    |                    |                |
| Full-time, %                                                                                                   | 30.6                                                               | 41.6               | 0.02           |
| Part-time, %                                                                                                   | 12.8                                                               | 11.1               |                |
| Retired, %                                                                                                     | 40                                                                 | 37.8               |                |
| Unemployed, %                                                                                                  | 16.7                                                               | 9.5                |                |
| Difficulty paying for basics                                                                                   |                                                                    |                    |                |

|                                     |      |      |       |
|-------------------------------------|------|------|-------|
| Hard or very hard, %                | 25.6 | 18.1 | 0.12  |
| Somewhat hard, %                    | 15.6 | 15.9 |       |
| Not very hard, %                    | 58.9 | 65.9 |       |
| Difficulty paying for medical care  |      |      |       |
| Very hard, %                        | 17.8 | 15.4 | 0.44  |
| Hard, %                             | 12.2 | 12.2 |       |
| Somewhat hard, %                    | 18.3 | 14.6 |       |
| Not very hard, %                    | 51.7 | 57.8 |       |
| Live with                           |      |      |       |
| Alone, %                            | 24.4 | 19.5 | 0.01  |
| Spouse/partner, %                   | 47.2 | 60   |       |
| Other, %                            | 10.6 | 10.8 |       |
| Children, %                         | 17.8 | 9.7  |       |
| Person close to, 3 or more, %       | 71.1 | 83.8 | <0.01 |
| Smoker, %                           | 32.2 | 17.3 | <0.01 |
| Coronary artery disease/prior MI, % | 20.6 | 13.8 | 0.04  |
| Peripheral vascular dis, %          | 3.3  | 3.2  | 0.96  |
| Previous Stroke/TIA, %              | 22.8 | 20   | 0.45  |
| Carotid stenosis, %                 | 4.4  | 3.8  | 0.71  |
| Heart failure, %                    | 11.1 | 3.2  | <0.01 |
| Hypertension, %                     | 80   | 74.9 | 0.18  |
| Diabetes mellitus, %                | 35   | 29.2 | 0.17  |
| Dyslipidemia, %                     | 34.4 | 44.9 | 0.02  |
| Atrial fibrillation/flutter, %      | 17.2 | 12.2 | 0.11  |
| Baseline Anticoagulation meds, %    | 41.7 | 35.7 | 0.17  |
| Baseline Antihypertensive meds, %   | 41.7 | 40   | 0.71  |
| Baseline Antilipidemic meds, %      | 33.9 | 37.8 | 0.37  |
| Baseline Antidiabetic meds, %       | 19.4 | 17.8 | 0.65  |

|                                            |           |           |      |
|--------------------------------------------|-----------|-----------|------|
| Discharge Anticoagulation, %               | 14.4      | 12.7      | 0.57 |
| Discharge Antidiabetic, %                  | 23.3      | 25.1      | 0.65 |
| Discharge Antihypertensive meds, %         | 60.6      | 61.1      | 0.91 |
| Discharge Cholesterol reducing meds, %     | 97.8      | 98.9      | 0.45 |
| Discharge Antidepressant medications, %    | 9.4       | 7         | 0.32 |
| Stroke mechanisms                          |           |           |      |
| Large artery atherosclerosis, %            | 17.2      | 17        | 0.63 |
| Cardioembolic, %                           | 26.7      | 23.8      |      |
| Small artery occlusion %                   | 21.1      | 22.7      |      |
| Other determined cause, %                  | 12.8      | 9.7       |      |
| Stroke of undetermined cause, %            | 22.2      | 26.8      |      |
| IV alteplase, %                            | 55        | 53.5      | 0.06 |
| Thrombectomy, %                            | 7.8       | 14.6      | 0.02 |
| Arrival mode                               |           |           |      |
| Arrival by EMS, %                          | 42.8      | 38.4      | 0.34 |
| Arrival self, %                            | 40.6      | 46.2      |      |
| Transfer, %                                | 14.4      | 14.6      |      |
| Onset-arrival time                         |           |           |      |
| < 4.5 hours, %                             | 25        | 34.1      | 0.17 |
| 4.5-8.0 hours, %                           | 8.9       | 9.2       |      |
| > 8.0 hours, %                             | 44.4      | 38.1      |      |
| Unknown, %                                 | 21.7      | 18.6      |      |
| NIHSS score, mean (SD)                     | 3.6 (4.4) | 3.9 (5.0) | 0.46 |
| Modified Rankin Score at discharge, 0-1, % | 65.6      | 66.2      | 0.88 |
| Independent ambulation at discharge, %     | 78.9      | 84.9      | 0.08 |
| Discharged directly to home, %             | 87.8      | 85.4      | 0.45 |

**Supplemental Table 3.** Baseline characteristics and 30-day adoption of medically related factors

| Characteristics                | Medication adherence |                |      | Medical appointment |                |       | OPT therapy  |                |       |
|--------------------------------|----------------------|----------------|------|---------------------|----------------|-------|--------------|----------------|-------|
|                                | no<br>(n=63)         | yes<br>(n=487) | p    | no<br>(n=99)        | yes<br>(n=451) | p     | no<br>(n=62) | yes<br>(n=193) | p     |
| Age, years, mean (SD)          | 63 (14)              | 63(14)         | 0.87 | 63 (13)             | 63(14)         | 0.88  | 61 (14)      | 66 (14)        | 0.02  |
| Neighborhood, years, mean (SD) | 15 (16)              | 16 (15)        | 0.67 | 13 (14)             | 16 (15)        | 0.03  | 12 (11)      | 17 (16)        | 0.01  |
| Female, %                      | 36.5                 | 44.4           | 0.24 | 44.4                | 43.2           | 0.83  | 45.2         | 49.2           | 0.58  |
| Race                           |                      |                |      |                     |                |       |              |                |       |
| Non-Hispanic White, %          | 57.1                 | 46.6           | 0.35 | 27.3                | 52.3           | <0.01 | 48.4         | 58.5           | 0.32  |
| Non-Hispanic Black, %          | 22.2                 | 23.6           |      | 37.4                | 20.4           |       | 24.2         | 21.8           |       |
| Hispanic, %                    | 17.5                 | 26.9           |      | 32.3                | 24.4           |       | 25.8         | 16.6           |       |
| Non-Hispanic Other, %          | 3.2                  | 2.9            |      | 3.0                 | 2.9            |       | 1.6          | 3.1            |       |
| Foreign born%                  | 22.2                 | 36.3           | 0.03 | 49.5                | 31.5           | <0.01 | 30.6         | 24.4           | 0.33  |
| English, %                     | 85.7                 | 73.7           | 0.04 | 63.6                | 77.6           | <0.01 | 79.0         | 86.0           | 0.19  |
| Education                      |                      |                |      |                     |                |       |              |                |       |
| Less than high school, %       | 6.3                  | 12.9           | 0.25 | 15.2                | 11.5           | 0.45  | 17.7         | 9.8            | 0.13  |
| Completed high school, %       | 31.7                 | 33.5           |      | 35.4                | 32.8           |       | 37.1         | 32.6           |       |
| Some college or more, %        | 61.9                 | 53.6           |      | 49.5                | 55.7           |       | 45.2         | 57.5           |       |
| Health insurance               |                      |                |      |                     |                |       |              |                |       |
| Private Insurance, %           | 23.8                 | 25.9           | 0.44 | 9.1                 | 29.3           | <0.01 | 21.0         | 30.6           | <0.01 |
| Medicare, %                    | 50.8                 | 43.1           |      | 40.4                | 44.8           |       | 30.6         | 52.8           |       |
| Medicaid, %                    | 1.6                  | 5.7            |      | 5.1                 | 5.3            |       | 14.5         | 2.1            |       |
| Self/None, %                   | 23.8                 | 25.3           |      | 45.5                | 20.6           |       | 33.9         | 14.5           |       |
| Employment                     |                      |                |      |                     |                |       |              |                |       |
| Full-time, %                   | 30.2                 | 39.0           | 0.17 | 29.3                | 39.9           | 0.13  | 35.5         | 35.2           | <0.01 |
| Part-time, %                   | 19.0                 | 10.7           |      | 16.2                | 10.6           |       | 11.3         | 9.8            |       |
| Retired, %                     | 41.3                 | 38.2           |      | 39.4                | 38.4           |       | 29.0         | 47.7           |       |
| Unemployed, %                  | 9.5                  | 12.1           |      | 15.2                | 11.1           |       | 24.2         | 7.3            |       |
| Difficulty paying for basics   |                      |                |      |                     |                |       |              |                |       |
| Hard or very hard, %           | 20.6                 | 20.5           | 0.99 | 36.4                | 17.1           | <0.01 | 21.0         | 16.6           | 0.15  |

|                                     |      |      |       |      |      |       |      |      |      |
|-------------------------------------|------|------|-------|------|------|-------|------|------|------|
| Somewhat hard, %                    | 15.9 | 15.8 |       | 18.2 | 15.3 |       | 22.6 | 14.0 |      |
| Not very hard, %                    | 63.5 | 63.7 |       | 45.5 | 67.6 |       | 56.5 | 69.4 |      |
| Difficulty paying for medical care  |      |      |       |      |      |       |      |      |      |
| Very hard, %                        | 22.2 | 15.4 | <0.01 | 25.3 | 14.2 | <0.01 | 16.1 | 10.4 | 0.28 |
| Hard, %                             | 4.8  | 13.1 |       | 19.2 | 10.6 |       | 11.3 | 14.0 |      |
| Somewhat hard, %                    | 27.0 | 14.4 |       | 20.2 | 14.9 |       | 21.0 | 13.5 |      |
| Not very hard, %                    | 46.0 | 57.1 |       | 35.4 | 60.3 |       | 51.6 | 62.2 |      |
| Live with                           |      |      |       |      |      |       |      |      |      |
| Alone, %                            | 20.6 | 21.1 | 0.21  | 20.2 | 21.3 | <0.01 | 22.6 | 18.7 | 0.33 |
| Spouse/partner, %                   | 46.0 | 57.1 |       | 44.4 | 58.3 |       | 46.8 | 59.1 |      |
| Other, %                            | 15.9 | 10.1 |       | 11.1 | 10.6 |       | 9.7  | 8.8  |      |
| Children%                           | 17.5 | 11.7 |       | 24.2 | 9.8  |       | 21.0 | 13.5 |      |
| Person close to, 3 or more, %       | 69.8 | 80.9 | 0.04  | 77.8 | 80.0 | 0.61  | 72.6 | 81.3 | 0.14 |
| Arrival mode                        |      |      |       |      |      |       |      |      |      |
| Arrival by EMS, %                   | 31.7 | 40.9 | 0.047 | 46.5 | 38.4 | 0.39  | 40.3 | 44.6 | 0.46 |
| Arrival self, %                     | 57.1 | 42.7 |       | 38.4 | 45.7 |       | 41.9 | 39.9 |      |
| Transfer, %                         | 7.9  | 15.4 |       | 13.1 | 14.9 |       | 17.7 | 13.0 |      |
| Arrival time                        |      |      |       |      |      |       |      |      |      |
| Onset-arrival < 4.5 hours, %        | 22.2 | 32.2 | 0.37  | 23.2 | 32.8 | 0.22  | 25.8 | 31.1 | 0.78 |
| Onset-arrival 4.5-8.0 hours, %      | 7.9  | 9.2  |       | 12.1 | 8.4  |       | 9.7  | 9.3  |      |
| Onset-arrival > 8.0 hours, %        | 47.6 | 39.2 |       | 41.4 | 39.9 |       | 43.5 | 43.5 |      |
| Unknown, %                          | 22.2 | 19.3 |       | 23.2 | 18.8 |       | 21.0 | 16.1 |      |
| Smoker, %                           | 23.8 | 22.0 | 0.74  | 22.2 | 22.2 | 0.99  | 33.9 | 19.7 | 0.02 |
| Hypertension, %                     | 76.2 | 76.6 | 0.94  | 84.8 | 74.7 | 0.03  | 79.0 | 75.1 | 0.53 |
| Diabetes mellitus, %                | 34.9 | 30.6 | 0.49  | 36.4 | 29.9 | 0.21  | 38.7 | 25.9 | 0.05 |
| Dyslipidemia, %                     | 39.7 | 41.7 | 0.76  | 31.3 | 43.7 | 0.02  | 30.6 | 48.2 | 0.02 |
| Atrial fibrillation/flutter, %      | 14.3 | 13.8 | 0.84  | 16.2 | 13.3 | 0.46  | 8.1  | 17.6 | 0.07 |
| Coronary artery disease/prior MI, % | 22.2 | 15.2 | 0.15  | 21.2 | 14.9 | 0.15  | 19.4 | 18.7 | 0.9  |
| Peripheral vascular dis, %          | 3.2  | 3.3  | 0.96  | 5.1  | 2.9  | 0.34  | 1.6  | 3.1  | 0.99 |

|                                    |              |              |       |              |              |       |              |              |       |
|------------------------------------|--------------|--------------|-------|--------------|--------------|-------|--------------|--------------|-------|
| Previous Stroke/TIA, %             | 23.8         | 20.5         | 0.55  | 29.3         | 19.1         | 0.02  | 27.4         | 21.8         | 0.36  |
| Carotid stenosis, %                | 4.8          | 3.9          | 0.74  | 5.1          | 3.8          | 0.56  | 1.6          | 4.1          | 0.69  |
| Heart failure, %                   | 11.1         | 5.1          | 0.06  | 9.1          | 5.1          | 0.12  | 4.8          | 7.8          | 0.57  |
| Baseline anticoagulation meds %    | 46.0         | 36.6         | 0.14  | 36.4         | 37.9         | 0.77  | 27.4         | 44.6         | 0.02  |
| Baseline antihypertensive meds, %  | 49.2         | 39.4         | 0.14  | 29.3         | 43.0         | 0.01  | 30.6         | 50.3         | <0.01 |
| Baseline antilipidemic meds, %     | 38.1         | 36.3         | 0.79  | 31.3         | 37.7         | 0.25  | 27.4         | 40.4         | 0.07  |
| Baseline antidiabetic meds, %      | 27.0         | 17.2         | 0.06  | 15.2         | 19.1         | 0.36  | 17.7         | 19.7         | 0.74  |
| Discharge anticoagulation, %       | 4.8          | 14.4         | 0.03  | 11.1         | 13.7         | 0.48  | 9.7          | 17.1         | 0.22  |
| Discharge antidiabetic, %          | 25.4         | 24.4         | 0.87  | 24.2         | 24.6         | 0.93  | 24.2         | 23.3         | 0.89  |
| Discharge antihypertensive meds, % | 74.6         | 59.1         | 0.02  | 40.4         | 65.4         | <0.01 | 66.1         | 73.1         | 0.29  |
| Discharge antilipidemic meds, %    | 98.4         | 98.6         | 0.99  | 98.0         | 98.7         | 0.28  | 100.0        | 99.5         | 0.99  |
| Discharge antidepressant meds, %   | 7.9          | 7.8          | 0.97  | 6.1          | 8.2          | 0.47  | 9.7          | 10.9         | 0.79  |
| NIHSS score, mean (SD)             | 3.3<br>(4.4) | 3.9<br>(4.9) | 0.35  | 4.3<br>(5.4) | 3.7<br>(4.7) | 0.32  | 3.6<br>(4.0) | 4.4<br>(5.1) | 0.21  |
| Stroke mechanisms                  |              |              |       |              |              |       |              |              |       |
| Large artery atherosclerosis, %    | 9.5          | 18.1         | 0.31  | 21.2         | 16.2         | 0.73  | 11.3         | 20.7         | 0.09  |
| cardio embolism, %                 | 25.4         | 24.6         |       | 25.3         | 24.6         |       | 14.5         | 24.4         |       |
| Small artery occlusion, %          | 28.6         | 21.4         |       | 22.2         | 22.2         |       | 27.4         | 23.8         |       |
| Other determined cause, %          | 14.3         | 10.3         |       | 10.1         | 10.9         |       | 14.5         | 8.3          |       |
| Stroke of undetermined cause, %    | 22.2         | 25.7         |       | 21.2         | 26.2         |       | 32.3         | 22.8         |       |
| IV alteplase, %                    | 57.1         | 53.6         | 0.59  | 57.6         | 53.2         | 0.43  | 58.1         | 50.3         | 0.28  |
| Thrombectomy, %                    | 1.6          | 13.8         | <0.01 | 9.1          | 13.1         | 0.27  | 8.1          | 12.4         | 0.35  |
| Modified Rankin Score, 0-1         | 74.6         | 64.9         | 0.36  | 57.6         | 67.8         | 0.26  | 54.8         | 52.3         | 0.52  |
| Independent ambulation, %          | 88.9         | 82.1         | 0.18  | 78.8         | 83.8         | 0.23  | 83.9         | 77.2         | 0.26  |
| Discharged to home                 | 90.5         | 85.6         | 0.29  | 77.8         | 88.0         | <0.01 | 96.8         | 77.7         | <0.01 |



| <b>Supplemental Table 4. Baseline characteristics and 30-day behavior modifications</b> |                          |                        |          |                       |                        |          |                              |                       |          |
|-----------------------------------------------------------------------------------------|--------------------------|------------------------|----------|-----------------------|------------------------|----------|------------------------------|-----------------------|----------|
| <b>Characteristics</b>                                                                  | <b>Diet modification</b> |                        |          | <b>Exercise</b>       |                        |          | <b>Toxic habit cessation</b> |                       |          |
|                                                                                         | <b>no<br/>(n=176)</b>    | <b>yes<br/>(n=374)</b> | <b>p</b> | <b>no<br/>(n=162)</b> | <b>yes<br/>(n=388)</b> | <b>p</b> | <b>no<br/>(n=82)</b>         | <b>yes<br/>(n=45)</b> | <b>p</b> |
| Age, years, mean (SD)                                                                   | 66 (14)                  | 62 (14)                | 0.004    | 66 (14)               | 62 (14)                | 0.004    | 59 (13)                      | 55 (12)               | 0.18     |
| Neighborhood, years, mean (SD)                                                          | 17 (16)                  | 15 (15)                | 0.21     | 16 (16)               | 15 (15)                | 0.89     | 13 (15)                      | 12 (12)               | 0.57     |
| Female, %                                                                               | 50.6                     | 40.1                   | 0.02     | 50.6                  | 40.5                   | 0.03     | 29.3                         | 31.1                  | 0.84     |
| Race                                                                                    |                          |                        |          |                       |                        |          |                              |                       |          |
| Non-Hispanic White, %                                                                   | 59.7                     | 42.2                   | <0.01    | 45.7                  | 48.7                   | 0.61     | 61.0                         | 62.2                  | 0.31     |
| Non-Hispanic Black, %                                                                   | 17.0                     | 26.5                   |          | 23.5                  | 23.5                   |          | 22.0                         | 11.1                  |          |
| Hispanic, %                                                                             | 19.9                     | 28.6                   |          | 26.5                  | 25.5                   |          | 15.9                         | 24.4                  |          |
| Non-Hispanic Other, %                                                                   | 3.4                      | 2.7                    |          | 4.3                   | 2.3                    |          | 1.2                          | 2.2                   |          |
| Foreign born%                                                                           | 26.1                     | 38.8                   | <0.01    | 36.4                  | 34.0                   | 0.59     | 15.9                         | 28.9                  | 0.11     |
| English, %                                                                              | 81.8                     | 71.9                   | 0.01     | 73.5                  | 75.8                   | 0.57     | 85.4                         | 82.2                  | 0.62     |
| Education                                                                               |                          |                        |          |                       |                        |          |                              |                       |          |
| Less than high school, %                                                                | 8.0                      | 14.2                   | 0.04     | 14.8                  | 11.1                   | 0.13     | 12.2                         | 11.1                  | 0.52     |
| Completed high school, %                                                                | 30.7                     | 34.5                   |          | 37.0                  | 31.7                   |          | 42.7                         | 33.3                  |          |
| Some college or more, %                                                                 | 61.4                     | 51.3                   |          | 48.1                  | 57.2                   |          | 45.1                         | 55.6                  |          |
| Health insurance                                                                        |                          |                        |          |                       |                        |          |                              |                       |          |
| Private Insurance, %                                                                    | 25.0                     | 25.9                   | <0.01    | 19.1                  | 28.4                   | 0.049    | 26.8                         | 37.8                  | 0.11     |
| Medicare, %                                                                             | 51.7                     | 40.4                   |          | 51.9                  | 40.7                   |          | 35.4                         | 15.6                  |          |
| Medicaid, %                                                                             | 6.8                      | 4.5                    |          | 6.2                   | 4.9                    |          | 9.8                          | 13.3                  |          |
| Self/None, %                                                                            | 16.5                     | 29.1                   |          | 22.8                  | 26.0                   |          | 28.0                         | 33.3                  |          |
| Employment                                                                              |                          |                        |          |                       |                        |          |                              |                       |          |
| Full-time, %                                                                            | 26.1                     | 43.6                   | <0.01    | 30.9                  | 41.0                   | 0.1      | 42.7                         | 62.2                  | 0.23     |
| Part-time, %                                                                            | 9.7                      | 12.6                   |          | 11.7                  | 11.6                   |          | 14.6                         | 8.9                   |          |
| Retired, %                                                                              | 52.3                     | 32.1                   |          | 42.0                  | 37.1                   |          | 23.2                         | 17.8                  |          |
| Unemployed, %                                                                           | 11.9                     | 11.8                   |          | 15.4                  | 10.3                   |          | 19.5                         | 11.1                  |          |
| Difficulty paying for basics                                                            |                          |                        |          |                       |                        |          |                              |                       |          |

|                                     |      |      |       |      |      |      |      |      |      |
|-------------------------------------|------|------|-------|------|------|------|------|------|------|
| Hard or very hard, %                | 13.1 | 24.1 |       | 27.2 | 17.8 |      | 15.9 | 28.9 |      |
| Somewhat hard, %                    | 14.8 | 16.3 | <0.01 | 12.3 | 17.3 | 0.03 | 20.7 | 24.4 | 0.13 |
| Not very hard, %                    | 72.2 | 59.6 |       | 60.5 | 64.9 |      | 63.4 | 46.7 |      |
| Difficulty paying for medical care  |      |      |       |      |      |      |      |      |      |
| Very hard, %                        | 11.4 | 18.4 |       | 16.7 | 16.0 |      | 22.0 | 22.2 |      |
| Hard, %                             | 6.3  | 15.0 | <0.01 | 17.9 | 9.8  | 0.09 | 4.9  | 15.6 | 0.18 |
| Somewhat hard, %                    | 18.2 | 14.7 |       | 16.0 | 15.7 |      | 15.9 | 22.2 |      |
| Not very hard, %                    | 64.2 | 51.9 |       | 49.4 | 58.5 |      | 57.3 | 40.0 |      |
| Live with                           |      |      |       |      |      |      |      |      |      |
| Alone, %                            | 22.2 | 20.6 |       | 20.4 | 21.4 |      | 24.4 | 26.7 |      |
| Spouse/partner, %                   | 55.1 | 56.1 | 0.97  | 53.1 | 57.0 | 0.41 | 50.0 | 46.7 | 0.98 |
| Other, %                            | 10.2 | 11.0 |       | 10.5 | 10.8 |      | 12.2 | 13.3 |      |
| Children%                           | 12.5 | 12.3 |       | 16.0 | 10.8 |      | 13.4 | 13.3 |      |
| Person close to, 3 or more, %       | 75.6 | 81.6 | 0.1   | 74.7 | 81.7 | 0.06 | 69.5 | 62.2 | 0.43 |
| Arrival mode                        |      |      |       |      |      |      |      |      |      |
| Arrival by EMS, %                   | 44.3 | 37.7 |       | 43.2 | 38.4 |      | 31.7 | 42.2 |      |
| Arrival self, %                     | 40.9 | 46.0 | 0.39  | 36.4 | 47.7 | 0.04 | 50.0 | 46.7 | 0.57 |
| Transfer, %                         | 14.2 | 14.7 |       | 17.9 | 13.1 |      | 17.1 | 11.1 |      |
| Arrival time                        |      |      |       |      |      |      |      |      |      |
| Onset-arrival < 4.5 hours, %        | 33.0 | 30.2 |       | 28.4 | 32.2 |      | 25.6 | 24.4 |      |
| Onset-arrival 4.5-8.0 hours, %      | 8.5  | 9.4  | 0.86  | 9.3  | 9.0  | 0.78 | 8.5  | 11.1 | 0.57 |
| Onset-arrival > 8.0 hours, %        | 38.1 | 41.2 |       | 43.2 | 38.9 |      | 42.7 | 51.1 |      |
| Unknown, %                          | 20.5 | 19.3 |       | 19.1 | 19.8 |      | 23.2 | 13.3 |      |
| Smoker, %                           | 26.7 | 20.1 | 0.08  | 24.7 | 21.1 | 0.36 | 56.1 | 64.4 | 0.36 |
| Hypertension, %                     | 69.9 | 79.7 | 0.01  | 82.7 | 74.0 | 0.03 | 79.3 | 66.7 | 0.14 |
| Diabetes mellitus, %                | 24.4 | 34.2 | 0.02  | 36.4 | 28.9 | 0.08 | 35.4 | 22.2 | 0.16 |
| Dyslipidemia, %                     | 40.3 | 42.0 | 0.72  | 35.2 | 44.1 | 0.05 | 35.4 | 33.3 | 0.84 |
| Atrial fibrillation/flutter, %      | 19.3 | 11.2 | 0.01  | 17.9 | 12.1 | 0.07 | 7.3  | 2.2  | 0.42 |
| Coronary artery disease/prior MI, % | 19.3 | 14.4 | .012  | 21.6 | 13.7 | 0.02 | 13.4 | 15.6 | 0.79 |

|                                    |              |              |       |              |           |      |              |              |       |
|------------------------------------|--------------|--------------|-------|--------------|-----------|------|--------------|--------------|-------|
| Peripheral vascular dis, %         | 4.0          | 2.9          | 0.52  | 4.9          | 2.6       | 0.16 | 2.4          | 4.4          | 0.61  |
| Previous Stroke/TIA, %             | 22.2         | 20.3         | 0.62  | 20.4         | 21.1      | 0.84 | 19.5         | 11.1         | 0.32  |
| Carotid stenosis, %                | 4.0          | 4.0          | 0.99  | 6.2          | 3.1       | 0.09 | 3.7          | 2.2          | 0.99  |
| Heart failure, %                   | 9.7          | 4.0          | <0.01 | 8.0          | 4.9       | 0.15 | 7.3          | 0.0          | 0.09  |
| Baseline anticoagulation meds %    | 40.9         | 36.1         | 0.28  | 42.0         | 35.8      | 0.17 | 42.7         | 13.3         | <0.01 |
| Baseline antihypertensive meds, %  | 44.9         | 38.5         | 0.15  | 45.1         | 38.7      | 0.16 | 42.7         | 26.7         | 0.08  |
| Baseline antilipidemic meds, %     | 35.8         | 36.9         | 0.8   | 34.6         | 37.4      | 0.53 | 25.6         | 15.6         | 0.26  |
| Baseline antidiabetic meds, %      | 16.5         | 19.3         | 0.43  | 21.0         | 17.3      | 0.31 | 19.5         | 11.1         | 0.32  |
| Discharge anticoagulation, %       | 16.5         | 11.8         | 0.13  | 17.3         | 11.6      | 0.07 | 7.3          | 4.4          | 0.71  |
| Discharge antidiabetic, %          | 20.5         | 26.5         | 0.13  | 25.3         | 24.2      | 0.79 | 24.4         | 24.4         | 0.99  |
| Discharge antihypertensive meds, % | 66.5         | 58.3         | 0.07  | 58.0         | 62.1      | 0.37 | 74.4         | 77.8         | 0.83  |
| Discharge antilipidemic meds, %    | 97.7         | 98.9         | 0.16  | 98.8         | 98.5      | 0.3  | 98.8         | 100.0        | 0.99  |
| Discharge antidepressant meds, %   | 10.8         | 6.4          | 0.07  | 6.2          | 8.5       | 0.35 | 12.2         | 17.8         | 0.43  |
| NIHSS score, mean (SD)             | 3.8<br>(4.7) | 3.9<br>(4.9) | 0.99  | 3.9<br>(5.3) | 3.4 (4.4) | 0.92 | 2.9<br>(3.3) | 4.2<br>(5.6) | 0.14  |
| Stroke mechanisms                  |              |              |       |              |           |      |              |              |       |
| Large artery atherosclerosis, %    | 13.6         | 18.7         | 0.35  | 18.5         | 16.5      | 0.56 | 18.3         | 17.8         | 0.37  |
| cardio embolism, %                 | 29.5         | 22.5         |       | 26.5         | 24.0      |      | 26.8         | 15.6         |       |
| Small artery occlusion, %          | 21.0         | 22.7         |       | 23.5         | 21.6      |      | 13.4         | 24.4         |       |
| Other determined cause, %          | 10.8         | 10.7         |       | 11.1         | 10.6      |      | 13.4         | 8.9          |       |
| Stroke of undetermined cause, %    | 25.0         | 25.4         |       | 20.4         | 27.3      |      | 28.0         | 33.3         |       |
| IV alteplase, %                    | 51.1         | 55.3         | 0.36  | 58.0         | 52.3      | 0.22 | 51.2         | 60.0         | 0.36  |
| Thrombectomy, %                    | 13.1         | 12.0         | 0.73  | 9.9          | 13.4      | 0.25 | 9.8          | 11.1         | 0.77  |
| Modified Rankin Score, 0-1         | 72.2         | 63.1         | 0.07  | 65.4         | 66.2      | 0.6  | 73.2         | 57.8         | 0.04  |
| Independent ambulation, %          | 79.0         | 84.8         | 0.09  | 76.5         | 85.6      | 0.01 | 87.8         | 93.3         | 0.38  |
| Discharged to home                 | 92.6         | 83.2         | <0.01 | 83.3         | 87.4      | 0.21 | 90.2         | 95.6         | 0.49  |

| <b>Supplemental Table 5. 30 days successful transition of care by discharge year</b> |                                 |          |                             |          |                |
|--------------------------------------------------------------------------------------|---------------------------------|----------|-----------------------------|----------|----------------|
| <b>Transition of care measures at 30 days</b>                                        | <b>Discharge year</b>           |          |                             |          |                |
|                                                                                      | <b>Pre-COVID-19 (2018-2019)</b> |          | <b>COVID-19 (2020-2021)</b> |          |                |
|                                                                                      | <b>N</b>                        | <b>%</b> | <b>N</b>                    | <b>%</b> | <b>p-value</b> |
| Medication Adherence                                                                 | 158                             | 88.8%    | 329                         | 88.4%    | 0.91           |
| Medical appointment                                                                  | 149                             | 83.7%    | 302                         | 81.2%    | 0.47           |
| Diet modification                                                                    | 120                             | 67.4%    | 254                         | 68.3%    | 0.84           |
| Regular exercise                                                                     | 133                             | 74.7%    | 225                         | 68.5%    | 0.14           |
| Outpatient therapy                                                                   | 53                              | 72.6%    | 140                         | 76.9%    | 0.47           |
| Toxic habit cessation                                                                | 11                              | 26.8%    | 34                          | 39.5%    | 0.16           |
| Adequate transition of care composite measure                                        | 120                             | 67.4%    | 250                         | 67.2%    | 0.96           |

| <b>Supplemental Table 6.</b> Comparison of characteristics between analytical sample and those with missing data on 30-day transition of stroke care measures |                                      |                                                                     |                |
|---------------------------------------------------------------------------------------------------------------------------------------------------------------|--------------------------------------|---------------------------------------------------------------------|----------------|
| <b>Characteristics</b>                                                                                                                                        | <b>Analytical sample<br/>(N=550)</b> | <b>Data with missingness on<br/>30- day TOC measures<br/>(N=74)</b> | <b>p-value</b> |
|                                                                                                                                                               | <b>% /mean (SD)</b>                  | <b>% /mean (SD)</b>                                                 |                |
| Age, years, mean (SD)                                                                                                                                         | 63.2 (14.2)                          | 63.4 (15.0)                                                         | 0.89           |
| Neighborhood, years, mean (SD)                                                                                                                                | 15.5 (15.2)                          | 16.6 (17.3)                                                         | 0.58           |
| Female, %                                                                                                                                                     | 43.5                                 | 52.7                                                                | 0.14           |
| Race                                                                                                                                                          |                                      |                                                                     |                |
| Non-Hispanic White, %                                                                                                                                         | 47.8                                 | 56.8                                                                | 0.28           |
| Non-Hispanic Black, %                                                                                                                                         | 23.5                                 | 18.9                                                                |                |
| Hispanic, %                                                                                                                                                   | 25.8                                 | 24.3                                                                |                |
| Non-Hispanic Other, %                                                                                                                                         | 2.9                                  | 0.0                                                                 |                |
| Foreign born%                                                                                                                                                 | 34.7                                 | 23.0                                                                | 0.04           |
| English, %                                                                                                                                                    | 75.1                                 | 86.5                                                                | 0.03           |
| Education                                                                                                                                                     |                                      |                                                                     |                |
| Less than high school, %                                                                                                                                      | 12.2                                 | 13.5                                                                | 0.43           |
| Completed high school, %                                                                                                                                      | 33.3                                 | 39.2                                                                |                |
| Some college or more, %                                                                                                                                       | 54.5                                 | 45.9                                                                |                |
| Health insurance                                                                                                                                              |                                      |                                                                     |                |
| Private Insurance, %                                                                                                                                          | 25.6                                 | 35.1                                                                | 0.38           |
| Medicare, %                                                                                                                                                   | 44.0                                 | 37.8                                                                |                |
| Medicaid, %                                                                                                                                                   | 5.3                                  | 4.1                                                                 |                |
| Self/None, %                                                                                                                                                  | 25.1                                 | 23.0                                                                |                |
| Employment                                                                                                                                                    |                                      |                                                                     |                |
| Full-time, %                                                                                                                                                  | 38.0                                 | 36.5                                                                | 0.91           |
| Part-time, %                                                                                                                                                  | 11.6                                 | 9.5                                                                 |                |
| Retired, %                                                                                                                                                    | 38.5                                 | 41.9                                                                |                |
| Unemployed, %                                                                                                                                                 | 11.8                                 | 10.8                                                                |                |
| Difficulty paying for basics                                                                                                                                  |                                      |                                                                     |                |

|                                     |      |      |      |
|-------------------------------------|------|------|------|
| Hard or very hard, %                | 20.5 | 14.9 | 0.08 |
| Somewhat hard, %                    | 15.8 | 25.7 |      |
| Not very hard, %                    | 63.6 | 58.1 |      |
| Difficulty paying for medical care  |      |      |      |
| Very hard, %                        | 16.2 | 12.2 | 0.15 |
| Hard, %                             | 12.2 | 9.5  |      |
| Somewhat hard, %                    | 15.8 | 24.3 |      |
| Not very hard, %                    | 54.4 | 48.6 |      |
| Live with                           | .    |      |      |
| Alone, %                            | 21.1 | 24.3 | 0.53 |
| Spouse/partner, %                   | 55.8 | 47.3 |      |
| Other, %                            | 10.7 | 14.9 |      |
| Children%                           | 12.4 | 12.2 |      |
| Person close to, 3 or more, %       | 79.6 | 73.0 | 0.26 |
| Arrival mode                        |      |      |      |
| Arrival by EMS, %                   | 39.8 | 45.9 | 0.53 |
| Arrival self, %                     | 44.4 | 39.2 |      |
| Transfer, %                         | 14.5 | 12.2 |      |
| Arrival time                        |      |      |      |
| Onset-arrival < 4.5 hours, %        | 31.1 | 23.0 | 0.08 |
| Onset-arrival 4.5-8.0 hours, %      | 9.1  | 13.5 |      |
| Onset-arrival > 8.0 hours, %        | 40.2 | 51.4 |      |
| Unknown, %                          | 19.6 | 12.2 |      |
| Smoker, %                           | 22.2 | 24.3 | 0.68 |
| Hypertension, %                     | 76.5 | 70.3 | 0.24 |
| Diabetes mellitus                   | 31.1 | 29.7 | 0.81 |
| Dyslipidemia, %                     | 41.5 | 37.8 | 0.55 |
| Atrial fibrillation/flutter         | 13.8 | 14.9 | 0.81 |
| Coronary artery disease/prior MI, % | 16.0 | 17.6 | 0.73 |

|                                         |           |           |             |
|-----------------------------------------|-----------|-----------|-------------|
| Peripheral vascular dis, %              | 3.3       | 2.7       | 0.79        |
| Previous Stroke/TIA, %                  | 20.9      | 28.4      | 0.14        |
| Carotid stenosis, %                     | 4.0       | 2.7       | 0.59        |
| Heart failure, %                        | 5.8       | 6.8       | 0.75        |
| Baseline Anticoagulation meds %         | 37.6      | 33.8      | 0.52        |
| Baseline Antihypertensive meds, %       | 40.5      | 37.8      | 0.66        |
| Baseline Antilipidemic meds, %          | 36.5      | 39.2      | 0.66        |
| Baseline Antidiabetic meds, %           | 18.4      | 18.9      | 0.91        |
| Discharge Anticoagulation, %            | 13.3      | 17.6      | 0.31        |
| Discharge Antidiabetic, %               | 24.5      | 20.3      | 0.42        |
| Discharge Antihypertensive meds, %      | 60.9      | 74.3      | <b>0.03</b> |
| Discharge Cholesterol reducing meds, %  | 98.5      | 97.3      | 0.42        |
| Discharge Antidepressant medications, % | 7.8       | 9.5       | 0.63        |
| NIHSS score, mean (SD)                  | 3.8 (4.8) | 3.7 (5.0) | 0.86        |
| Stroke mechanisms                       |           |           |             |
| Large artery atherosclerosis, %         | 17.1      | 16.2      | 0.96        |
| Cardio embolism, %                      | 24.7      | 25.7      |             |
| Small artery occlusion%                 | 22.2      | 20.3      |             |
| Other determined cause, %               | 10.7      | 13.5      |             |
| Stroke of undetermined cause, %         | 25.3      | 24.3      |             |
| IV alteplase, %                         | 54.0      | 45.9      | 0.19        |
| Thrombectomy, %                         | 12.4      | 9.5       | 0.47        |
| Modified Rankin Score, 0-1              | 66.0      | 66.2      | 0.51        |
| Independent ambulation at discharge, %  | 82.9      | 78.4      | 0.34        |
| Discharged directly to home             | 86.2      | 74.3      | 0.008       |
